# Supplementary material for: Dual-sensitized modification engineering with enhanced photocatalytic degradation for organic dye
Source: Research Square preprint supplement (doi:10.21203/rs.3.rs-246705/v1), 2021-02-26
Supplement: Supplementary file 1 [file 50958eeeb0acaf2460664e0c.docx]

[] (C0, initial concentration; C, reaction concentration).

(αhν)2=c(hν-Eg) (a)
